# Supplementary material
Source: PubMed Central journal article supplement (PMC2565975)
Supplement: supp_74_19_6102__1.pdf [file supp_74_19_6102__1.pdf]

# Optimizing Metabolic Capacity and Flux through Environmental Cues to Maximize Hydrogen Production by Cyanobacterium *Arthrospira (Spirulina) maxima*

Gennady Ananyev, Damian Carrieri and G. Charles Dismukes

Department of Chemistry, Princeton University, and Princeton Environmental Institute

Princeton, NJ 08544 Phone: (609) 258-3896, Fax: (609) 258-1980,

E-mail: [dismukes@princeton.edu](mailto:dismukes@princeton.edu)

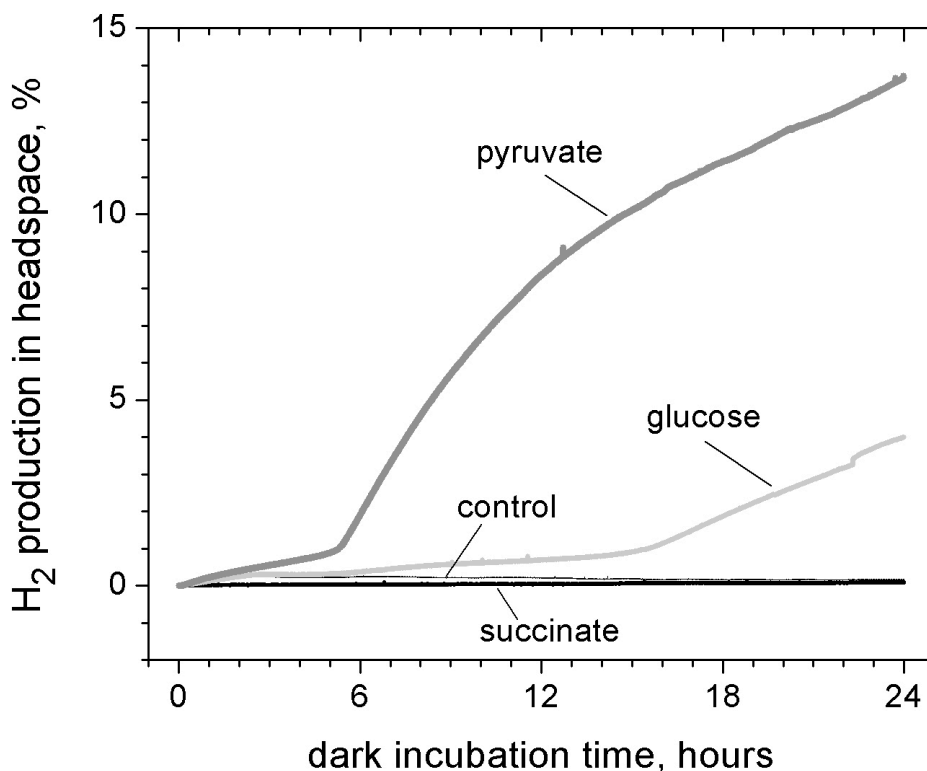

S-1. Dark H<sub>2</sub> production by *Arthrospira maxima* in the presence of exogenously added substrates (at time 0): pyruvate (10mM), glucose (20mM), and succinate (10mM) or no additions (control). H<sub>2</sub> was measured in a bioreactor device consisting of a round-bottom flask (100 mL) with 50mL of cells at moderate density (~1.5 g dry weight/L) interfaced with a Clark-type electrode for continuous monitoring of H<sub>2</sub> in the headspace, previously calibrated with gaseous standards.

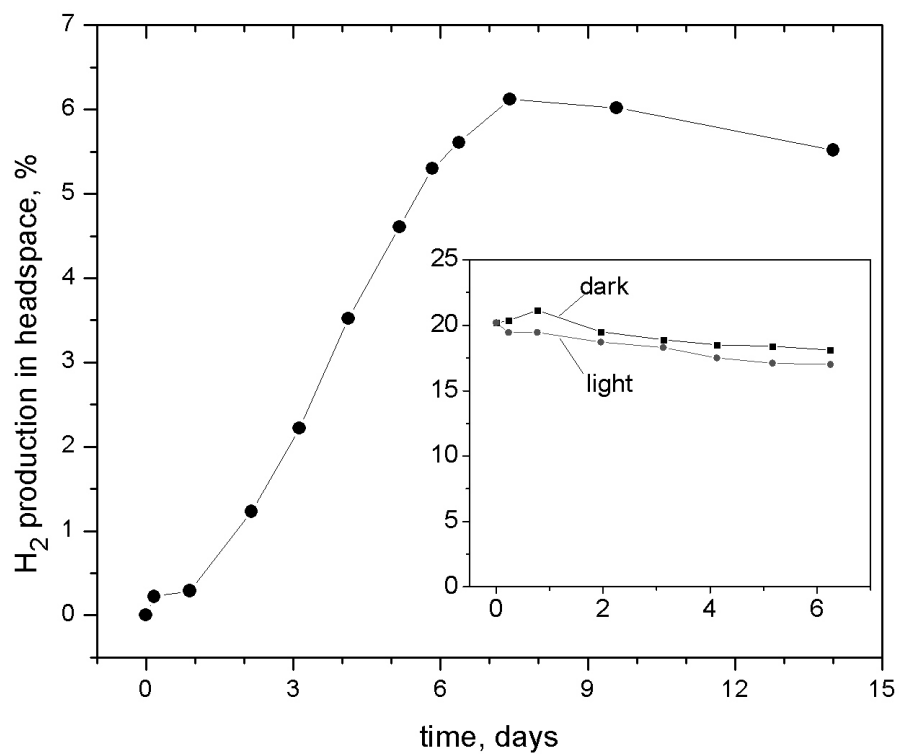

S-2. Dark H<sub>2</sub> production by *A. maxima* cells grown photoautotrophically for 1 month (12 days stage 1, 18 days stage 2) in batch culture as described in Materials and Methods. The sample volume is 25 mL, the headspace gas volume is 33 mL. Zarrouk's medium was additionally supplemented with 1  $\mu\text{M}$  Ni<sup>2+</sup> as previously described (12). Inset shows the results of illuminating (white light, PFD =  $\sim 70 \mu\text{E m}^{-2} \text{s}^{-1}$ ) and darkness on the H<sub>2</sub> concentration in the headspace after first purging with 20 % H<sub>2</sub> + 80 % N<sub>2</sub> at the beginning of anaerobiosis.

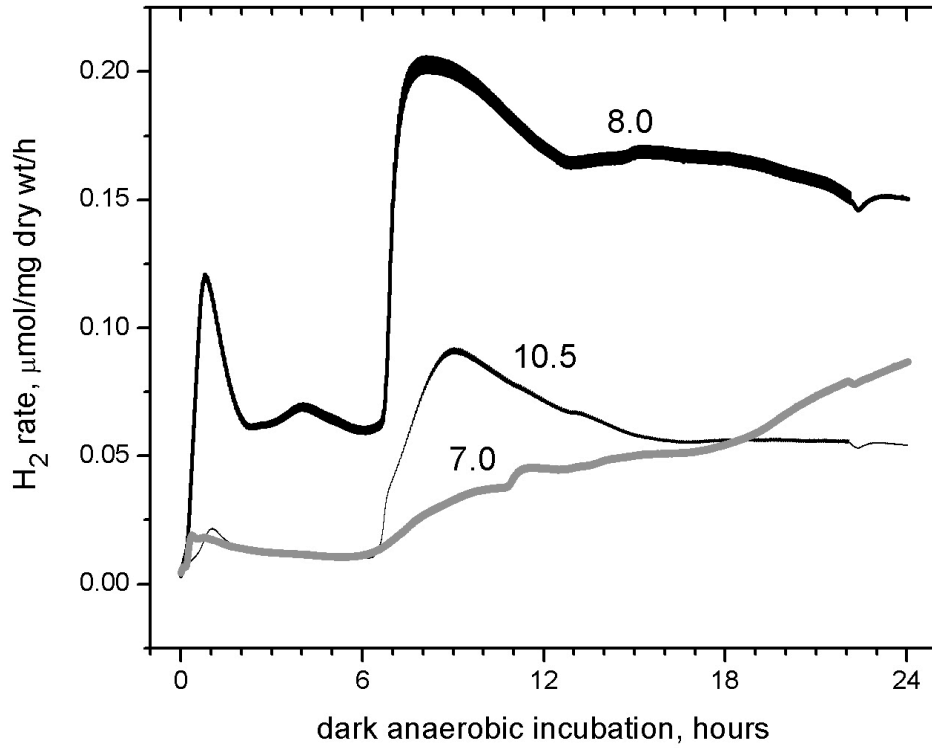

S-3. Dark anaerobic H<sub>2</sub> production by *A. maxima* cells grown photoautotrophically at different pH values in Zarrouk's medium, pH adjusted by addition of HCl (to lower pH to 7.0 or 8.0), and measured in the same medium.
